1 **Emotion regulation and cognitive function as mediating factors for the association between**  
2 **lifetime abuse and risky behaviors in women of color**

3  
4 <sup>a</sup>Karina Villalba, <sup>b</sup>Lisa H. Domenico, <sup>c</sup>Robert L. Cook, <sup>d</sup>Julia O'Connor, <sup>a</sup>Kyndester Michael-  
5 Samaroo, <sup>e</sup>Maria Jose Del Pino Espejo, <sup>f</sup>Pilar Martin, <sup>g</sup>Jessy G. Dévieux

6  
7 <sup>a</sup>College of Medicine, University of Central Florida, Orlando, FL.

8 <sup>b</sup>College of Nursing, University of Florida, Gainesville, FL.

9 <sup>c</sup>Department of Epidemiology, University of Florida, Gainesville FL.

10 <sup>d</sup>School of Social Work, University of Central Florida, FL

11 <sup>a</sup>College of Medicine, University of Central Florida, Orlando FL.

12 <sup>e</sup>Department of Sociology, Universidad Pablo De Olavide, Seville, Spain

13 <sup>f</sup>College of Nursing and Public Health, Adelphi University, Garden City NY

14 <sup>g</sup>Department of Health Promotion and Disease Prevention, Florida International University,  
15 Miami, FL.

16 \_\_\_\_\_

17  
18 Corresponding author: Karina Villalba

19 Population Health, College of Medicine,

20 University of Central Florida. 4000 Central Florida Blvd, Orlando FL 32816

21 Email: [karina.villalba@uc.edu](mailto:karina.villalba@uc.edu)

22

23

24 Lisa H. Domenico  
25 University of Florida  
26 Gainesville FL 32611  
27 Tel (352) 273-5869  
28 Email: [ldomenico@ufl.edu](mailto:ldomenico@ufl.edu)

29  
30 Robert L. Cook  
31 University of Florida.  
32 Gainesville FL 32611  
33 Tel (352) 273-5869  
34 Email: [cookrl@ufl.edu](mailto:cookrl@ufl.edu)

35  
36 Julia O'Connor  
37 University of Central Florida  
38 Orlando FL 32816  
39 Tel (407) 823-3137  
40 Email: [julia.oconnor@ucf.edu](mailto:julia.oconnor@ucf.edu)

41  
42 Kyndester Michael-Samaroo  
43 University of Central Florida  
44 Orlando FL 32816  
45 Email: [kmichaelsamaroo@knights.ucf.edu](mailto:kmichaelsamaroo@knights.ucf.edu)

46  
47 Maria Jose Pilar de Pino  
48 Universidad Pablo de Olavide  
49 Seville, Spain  
50 Email: [mjpinesp@upo.es](mailto:mjpinesp@upo.es)

51  
52 Pilar Martin  
53 Adelphi University,  
54 1 South Ave, Garden City, NY 11530  
55 Tel: (516) 877-4528  
56 Email: [mpmartin@adelphi.edu](mailto:mpmartin@adelphi.edu)

57  
58 Jessy G. Dévieux  
59 Florida International University,  
60 3000 NE 15 ST North Miami, Florida 33125.  
61 Tel: (305) 348-7789  
62 Email: [devieuxj@fiu.edu](mailto:devieuxj@fiu.edu)

63

64

65

66

67 **Abstract**

68 **Background:** Lifetime abuse (i.e., childhood abuse, intimate partner violence) has been  
69 linked to risky behavioral outcomes (i.e., alcohol use, risky sex). Women who experience  
70 lifetime abuse have poor emotion regulation and may have problems with executive functioning,  
71 which could help explain the relationship between lifetime abuse and risky behaviors. However,  
72 research on executive functioning and emotion regulation as mediators of this relationship has  
73 been limited. In the present study, we examined this association. We hypothesized that lifetime  
74 abuse would be related to greater difficulty in emotion regulation and executive function, which  
75 would also be associated with greater alcohol use and risky sex. **Methods:** This cross-sectional  
76 study included 150 women with a history of lifetime abuse who were assessed for alcohol use  
77 using the AUDIT Score; emotion regulation was measured using the Difficulties with Emotion  
78 Regulation Scale (DERS); risky sex was measured using question: "in the last 90 days, how  
79 many people did you have anal or vaginal sex without using a condom? Executive function was  
80 assessed using the NIH Toolbox. **Results:** The mediation model followed the self-regulation  
81 theory, which proposes executive function as the higher-order cognitive process. Results showed  
82 that executive function deficit and poor emotion regulation significantly mediated the  
83 relationship between lifetime abuse and alcohol use severity (indirect effect = .097, SE .031,  
84 95% CI = .035 to .158). **Conclusion:** Our findings suggest executive function and emotion  
85 regulation as a potential mechanism for alcohol use severity in women who experienced lifetime  
86 abuse (i.e., childhood abuse and intimate partner violence).

87

88 **Key Words:** Alcohol abuse, cognitive function, emotion regulation, childhood abuse, intimate  
89 partner violence.

90 **1. Introduction**

91 One of the long-term adverse implications of childhood abuse is revictimization in  
92 adulthood, with higher rates among women who experienced childhood abuse than among  
93 women who did not experience childhood abuse (1, 2). There is increasing support from the  
94 research literature to view lifetime abuse as a cumulative effect of different types of abuse (e.g.,  
95 emotional, physical, and sexual) from one or various perpetrators across the developmental  
96 lifespan [e.g., childhood, adolescence, adulthood; ((3-6) ].

97 Lifetime abuse is associated with multiple negative outcomes, including alcohol use  
98 disorders (AUD) and risky sex. Women who experience lifetime abuse are more likely to report  
99 high-risk partners (e.g., intravenous drug users, HIV-positive individuals). They tend to engage  
100 in risky sexual behaviors, including inconsistent condom use, promiscuity, and early sexual  
101 initiation, increasing their risk for HIV infection (7-9). There is also growing evidence  
102 suggesting that women who experienced lifetime abuse can be less sexually assertive. This  
103 behavior can result in less condom insistence and a greater likelihood of unprotected sex (10).  
104 Additionally, women who experienced lifetime abuse are twice as likely to suffer from AUD  
105 compared to women who experienced either childhood abuse or intimate partner violence alone  
106 (11-13). These women are more likely to begin drinking at a younger age and report more  
107 problems related to alcohol use (14-16).

108 In addition, women who experienced lifetime abuse have long-term difficulties with  
109 emotion regulation strategies and engage in emotionally avoidant coping behaviors ((17-21)).  
110 Furthermore, Furthermore, women in violent relationships are usually subjected to emotional  
111 invalidation by their partners, which in turn can lead to developing more frequent and long-  
112 lasting periods of inability to control their emotions and use alcohol as a negative coping

113 behavior (22, 23). Women who experienced lifetime abuse are also at a higher risk of developing  
114 cognitive problems, including executive dysfunction. Developmental neuroscience suggests that  
115 adverse environments resulting from abuse and/or violence may expose children to chronic  
116 stress, which can disrupt brain architecture and impair the development of executive function,  
117 leading to cognitive problems in adulthood (24).

118         The Self-regulation Model proposes a causal order that includes executive function as a  
119 higher-order cognitive process that contributes to emotion regulation (25). This higher-order  
120 model (i.e., executive function promoting emotion regulation) provides a framework for  
121 understanding how individuals interpret, respond, and adjust to negative experiences. Self-  
122 regulation failure is associated with negative emotional states, resulting in executive function  
123 deficit and poor emotional regulation, ultimately leading to maladaptive coping behaviors (26).  
124 Executive function is described as a higher-order cognitive process that includes planning,  
125 cognitive flexibility, social cognition, emotion regulation, and behavioral competencies such as  
126 attitudes and behaviors (Miyake et al., 2000). Executive function can be described as either hot  
127 or cold. Cold executive functions are associated with planning, working memory, behavioral  
128 monitoring, and inhibition. Whereas hot executive functions are conceptualized as social  
129 cognition and emotions (Chung et al., 2011). There has been increased interest in recent years in  
130 the role of hot executive functioning as the control center of emotional expression. This is  
131 important because these processes are crucial for an individual's social interaction and social-  
132 emotional development (Banducci et al., 2014). Emotion regulation can be intrinsic or extrinsic;  
133 intrinsic refers to one regulating their own emotions (i.e., self-regulatory processes); extrinsic  
134 refers to an individual regulating someone else's emotions (e.g., a parent regulating the emotions  
135 of an infant by soothing her (27). Developmental psychology studies have shown that one of the

136 roles of a parent is to teach a child emotion regulation strategies; however, children growing up  
137 in abusive environments may not be able to develop an intrinsic regulation mechanism because  
138 of the lack of support from their parents (28, 29). In fact, research shows that adult survivors of  
139 childhood abuse exhibit poorer intrinsic emotion regulation skills than their non-abused  
140 counterparts (30). Thus, poor emotion regulation denotes a rigid and maladaptive use of emotion  
141 regulation strategies and the inability to choose the most appropriate strategy for achieving goals  
142 (31).

143         Research indicates well-established relationships between childhood abuse, intimate  
144 partner violence, poor emotion regulation, and risk behaviors (alcohol abuse and risky sex). (13,  
145 25, 32). However, the present study aimed to provide additional evidence for an association  
146 between cognitive function, emotion regulation, and risky sex and propose that deficit in  
147 cognitive function and poor emotion regulation mediates the relationship between lifetime abuse  
148 and risk behaviors (alcohol abuse and risky sex). Furthermore, the present study adds to the  
149 literature in multiple ways. First, we address lifetime abuse conceptualized as emotional,  
150 physical, or sexual revictimization across two periods (childhood and adulthood). This is  
151 important as much of the prior research has focused on a single type of abuse and/or time period.  
152 Second, we anticipate that poor emotion regulation and deficit in cognitive function will be  
153 indirectly associated with lifetime abuse and risk behaviors. Previous research shows that women  
154 who experienced abuse may be at increased risk for relying on maladaptive strategies for self-  
155 regulating negative emotions or coping with negative experiences. As such, we expect that  
156 lifetime abuse would be significantly associated with difficulty in emotion regulation. Therefore,  
157 we propose to evaluate executive function and emotion regulation as mediating pathways in the  
158 relationship between lifetime abuse and risk behavioral outcomes. We hypothesized that poor

159 emotion regulation and a greater deficit in executive function would mediate the association  
160 between lifetime abuse, alcohol use severity, and risky sex.

## 161 **2. Methods**

### 162 **2.1. Participants and Procedure**

163 This was a cross-sectional study with 150 women of color (African American, Hispanic)  
164 reporting a history of childhood abuse and intimate partner violence between 2018 and 2019.  
165 The sample consisted of women of color (Hispanic and African American) at risk for HIV  
166 recruited from four community-based organizations located in a densely populated, multicultural,  
167 urban area in South Florida. The recruitment was in-person, using flyers and presentations. To be  
168 eligible, participants had to be between 18 and 50 years old; have a history of childhood abuse  
169 and/or intimate partner violence; have at least one episode of a sexual encounter in the last three  
170 months; a history of alcohol use in the last three months; fluent in spoken English and/or  
171 Spanish; and be able to provide informed consent. This study was approved by the Institutional  
172 Review Board of Florida International University, and all women provided written informed  
173 consent.

### 174 **2.2 Measures**

175 The survey was available in both English and Spanish. The survey instruments that were  
176 not validated in Spanish were translated into Spanish and then back-translated and reviewed by a  
177 Cultural Linguistic Group to ensure cultural appropriateness and relevance. The survey  
178 instrument measured the following domains used within the current analysis.

179 **Demographics.** Self-reported sociodemographic information included age, race and  
180 ethnicity, employment status, and education.

### 181 **2.3 Predictors**

182           ***Intimate partner violence.*** The World Health Organization (WHO) Self-reported  
183 Questionnaire (33) was used to measure intimate partner violence. This is a culturally adapted  
184 questionnaire from a multi-country study conducted by the WHO. The 20-item questionnaire  
185 asked participants about the type of abuse (emotional, physical, sexual) and the timing of the  
186 abuse (last 12 months, lifetime). Responses to these questions were 'Yes (= 1)' and 'No (= 0)'. All  
187 questions were added to compute a composite score that ranged from 0 to 13 for IPV, with  
188 higher scores indicating higher abuse.

189           ***Childhood Abuse:*** The Childhood Trauma Questionnaire measured childhood emotional,  
190 physical, and sexual abuse and neglect (Fink et al., 1995). Participants were asked about their  
191 experiences with types of abuse during their childhood. All questions utilized a five-point Likert  
192 scale with responses ranging from "never true" to "very often," with a total of four subscales  
193 measuring each type of abuse with a maximum possible score of 25, with higher scores reflecting  
194 higher childhood abuse.

195           ***Lifetime abuse.*** For this study, we developed a continuous additive weighted composite  
196 score that included variables from childhood abuse and intimate partner violence.

## 197 **2.4 Mediators**

198           ***Difficulties with Emotion Regulation.*** This construct was measured using the  
199 Difficulties with Emotion Regulation (DERS) scale (Gratz & Roemer, 2003), which evaluates  
200 emotion regulation difficulties in six areas, including nonacceptance of emotional responses,  
201 difficulties engaging in goal-directed behaviors, impulse-control difficulties, lack of emotional  
202 awareness, limited access to emotion regulation strategies, and lack of emotional clarity. Scores  
203 ranged between 36 to 180, with prior research suggesting the clinical range on DERS total scores  
204 between 80 -127. Higher scores indicate greater difficulties with emotion regulation.



205            **Executive function** was measured using the NIH Toolbox in English and Spanish using  
206 normative data from English- and Spanish-speaking populations (34). Executive control was  
207 measured using the Flanker Inhibitory Control and Attention and the Dimensional Change Card  
208 Sort test. We pooled the Flanker Test, which measures the allocation of an individual's limited  
209 capacities to deal with environmental stimulation, and the Dimensional Change Card Sort Test,  
210 which measures the capacity to plan, organize and monitor the executive of behaviors that are  
211 strategically directed, in a goal-oriented manner as predictors of executive functioning. Higher  
212 scores indicated higher levels of cognitive functioning. A standard score at or near 100 indicates  
213 cognitive ability that is average compared with others nationally. Standard scores around 115  
214 suggest above-average cognitive ability, while scores around 130 suggest superior ability (in the  
215 top 2 percent nationally, based on Toolbox normative data). Conversely, a standard score of  
216 around 85 suggests below-average cognitive ability, and a score in the range of 70 or below  
217 (bottom 2 percent) suggest very low cognitive functioning.

## 218 **2.5 Outcomes**

219            **Risky sex.** To measure sexual risk, we used a continuous variable using the following  
220 question: "in the last 90 days, how many people did you have anal or vaginal sex with without  
221 using a condom?"

222            **Alcohol use severity.** The Alcohol Use Disorders Identification Test (AUDIT) is a 10-  
223 item survey that measures alcohol consumption, dependence symptoms, and personal and social  
224 harm reflective of drinking over the past 30 days (Saunders et al., 1993). It covers the areas of  
225 alcohol consumption, drinking behavior, and alcohol-related problems. Responses are scored  
226 from 0 to 4, with a maximum possible score of 40, with higher scores indicating problematic  
227 drinking. A score of 8 or more is associated with harmful or hazardous drinking. For this study,

228 hazardous alcohol use was a continuous variable defined as hazardous alcohol use with a score  $\geq$   
229 8.

### 230 **3. Data Analysis**

231 The data analytic plan included three steps. First, descriptive statistics were computed;  
232 second, correlations were estimated for all variables in the mediation models; and third, to  
233 measure the alcohol and risky sex mediating models, we measured the direct and indirect  
234 associations between lifetime abuse, executive function, emotion regulation, alcohol use, and  
235 risky sex.

236 Descriptive data were analyzed using SPSS 26.0 (IMB, Chicago, IL) and were checked  
237 for normality, outliers, and missing values. Descriptive statistics (mean, standard deviations,  
238 skewness, kurtosis) were calculated to describe sample characteristics and tested for normality  
239 assumptions for all continuous variables. Correlation analyses were conducted for all continuous  
240 variables. Bivariate analysis of demographic and key variables was conducted utilizing chi-  
241 square tests. Demographic and other continuous variables significantly associated at the bivariate  
242 level with alcohol use severity/risky sex were included in subsequent models as covariates.

243 We performed two serial mediation models – Model 1, alcohol use severity, and Model 2,  
244 risky sex. These models used the serial mediation model to predict the relationship between  
245 executive function deficit and poor emotion regulation as mediating variables in the pathway  
246 between lifetime abuse and risk behaviors. The direct and indirect effects of lifetime abuse on  
247 alcohol use severity and risky sex via the mediating mechanism of executive function and  
248 emotion regulation were assessed with multiple ordinary least squares (OLS) regressions through  
249 the SPSS macro PROCESS version 3.203 (Hayes & Preacher, 2014). This method

250 simultaneously estimates the direct association of X on Y (c'-path), the direct association of X on  
251 M (a-path), the direct association of M on Y (b-path), and the indirect association of X (lifetime  
252 abuse) on Y (alcohol use severity or risky sex) via M (poor emotion regulation and executive  
253 function deficit). The indirect effect (i.e., mediation) was tested using 10,000 resampling bias-  
254 corrected bootstrap confidence intervals (95% CI). Indirect effect models were run separately for  
255 alcohol use severity and risky sex. Lifetime abuse was entered as the X (independent) variable.  
256 Executive function deficit and poor emotion regulation were entered as serial mediating variables  
257 into each model [alcohol use severity and risky sex (i.e., number of partners in the last 90 days).  
258 Alcohol use severity and risky sex were entered into the models individually as the Y  
259 (dependent) variable. Age and level of education were entered into all models as control  
260 variables. We chose the OLS regression as a preferred method as it offers the least Type I and  
261 Type II errors (Preacher & Hayes, 2004), and it has greater power to detect mediational effects  
262 than similar approaches (MacKinnon et al., 2002).

## 263 **4. Results**

### 264 **4.1 Descriptive Analysis**

265 The mean age was 42 (SD = 11.0) years old (see Table 1). Forty-seven percent were  
266 Black, with 54% of the sample self-identified as Hispanic. The mean alcohol use among the  
267 women was 10.4 (SD = 8.6), indicating alcohol use severity. The mean number of sexual  
268 partners without using a condom in the last 90 days was 2 (SD = .97). The mean score for  
269 emotion regulation was 84.2 (SD = 24.5), with higher scores indicating difficulties in emotion  
270 regulation; similarly, the executive function score of 72 (SD = 12.5) indicated lower executive  
271 functioning compared to the normative data which may indicate difficulties in general  
272 functioning.

## 273 **4.2 Correlational Analysis**

274 We found a positive correlation between lifetime abuse and poor emotion regulation  
275 (.284,  $p < .001$ ). Risky sex was positively correlated with poor emotion regulation (.324,  $p <$   
276 .001) and alcohol use severity (.183  $p < .05$ ; See Table 2).

## 277 **4.3 Mediation Results**

278 We tested two serial mediation models with differing outcome variables. Model 1 -  
279 alcohol use severity; Model 2 – risky sex. The mediators were ordered between the predictor and  
280 the outcome. The order of the mediators followed the self-regulation theory; we first included  
281 executive function as the higher-order cognitive process, followed by emotion regulation (26).  
282 Since this is a cross-sectional study, we cannot imply causality, but results may pave the way for  
283 future longitudinal mediation analysis measuring key study constructs.

## 284 **4.4 Alcohol Use Severity**

285 For Model 1, the total effect model was statistically significant; the mediators, executive  
286 function deficit, and poor emotion regulation were indirectly associated with lifetime abuse and  
287 alcohol use severity. See Figure 1 which illustrates the results of the mediation model analysis  
288 and Table 3 for the direct and indirect results. This was a fully mediated pathway. The indirect  
289 effect of executive function deficit via poor emotion regulation on the association between  
290 lifetime abuse and alcohol use severity was significant, with the total effect size accounting for  
291 10% for a deficit in executive functioning and emotion regulation (indirect effect = .097, SE  
292 .031, 95% CI = .035 to .158).

## 293 **4.5 Risky Sex Model**

294 For the serial multiple mediation risky sex (Model 2), we measured the mediating effect  
295 of executive function deficit and poor emotion regulation between lifetime abuse and risky sex.  
296 The results of the model were partially significant. Only a deficit in executive function was  
297 indirectly associated with lifetime abuse and risky sex. See Figure 2 which illustrates the results  
298 of the mediation model analysis and Table 3 for the direct and indirect results. This was a fully  
299 mediated pathway. The indirect effect via deficit in executive function on the association  
300 between lifetime abuse and risky sex was significant, with the total effect size accounting for 8%  
301 (indirect effect = .078% SE = .051 95% CI = .002 to .198).

## 302 **5. Discussion**

303 To gain further insight into the pathway between lifetime abuse and risky behavioral  
304 outcomes, we evaluated the mediating role of executive function and emotion regulation using a  
305 serial mediation model. This study has the potential to significantly add to the understanding of  
306 the mechanisms that contribute to increased alcohol use and risky sex in women of color with a  
307 history of lifetime abuse. For these models, we followed the self-regulation theory, which  
308 focuses on a higher-order relationship between emotions and cognition. Consistent with our  
309 hypothesis, our results support previous findings in the literature regarding alcohol use (35-37);  
310 for women with lifetime abuse, reported poor emotion regulation was associated with greater  
311 alcohol use severity. Our study is also in line with a recent study demonstrating that exposure to  
312 childhood abuse was associated with a deficit in executive function and poor emotion regulation,  
313 which predicted future alcohol use behaviors in adolescents (38). Thus, our findings suggest that  
314 the pathway between lifetime abuse and alcohol use severity may occur through a cognitive-  
315 emotional mechanism. Results from this study are also consistent with the self-regulation theory,  
316 which proposes a higher-order cognitive process in connection with emotion regulation to

317 produce an integrated behavioral response (Mueller & Peterson, 2012). Emerging research shows  
318 that growing up in an abusive environment contributes to a deficit in executive functioning and  
319 poor emotion regulation. These types of environments can affect the organization and integration  
320 of neural circuits involved in emotion and cognitive functions, which can impair self-regulation  
321 and contribute to a host of maladaptive outcomes in adulthood (24, 28-30). Thus, the pathway to  
322 emotionally avoidant coping behaviors (e.g., alcohol use severity) may be through a deficit in  
323 executive functioning and heightened emotional reactivity in women with a history of lifetime  
324 abuse.

325         Although we did not identify specific executive function processes or emotion regulation  
326 facets, this study demonstrated that the mechanism for alcohol use severity in women with  
327 lifetime abuse could be explained via the cognitive-emotional model. Research focusing on  
328 specific processes of executive function and emotion regulation may present valuable  
329 information on the mechanism for self-regulation among women with lifetime abuse.

330         We also tested the mediating role of executive function deficit and poor emotion  
331 regulation in the relationship between lifetime abuse and risky sex. We hypothesized that a  
332 deficit in executive function and poor emotion regulation would mediate the relationship  
333 between lifetime abuse and risky sex; however, our results showed that executive function deficit  
334 was the only significant mediator. Although more research needs to be done to understand the  
335 effect of emotion regulation on risky sex, the results showed that lower executive functioning is  
336 significantly associated with increased risky sex. Neuroscience research has shown that  
337 alterations in the frontoparietal executive control network in adults with a history of abuse have  
338 implications for decision-making (Zhao et al., 2021). Moreover, impairments in the executive  
339 control network lead to a shift from flexible, goal-directed behavior to inflexible stimulus-

340 response, making self-regulation more difficult (39). Another factor that may have the potential  
341 to influence risky sex is cognitive appraisals. For example, anticipated negative partner reaction  
342 has predicted women's decreased sexual assertiveness and condom self-efficacy (40). Our study  
343 was not designed to determine factors that may have contributed to this behavior. However, this  
344 is the first known study to analyze these relationships; thus, a longitudinal study focusing on  
345 specific executive function and emotion regulation processes for risky sex may be warranted.

### 346 **5.1 Limitations and Future Directions**

347 Findings from this investigation should be interpreted in light of its limitations. First,  
348 although we used validated self-report measures commonly used in the field, in-person  
349 interviews are subject to recall and social desirability bias. Second, we did not use specific  
350 processes to measure executive function and emotion regulation; instead, we used the cumulative  
351 assessment for these two variables. As mentioned earlier, disentangling the effects of executive  
352 function and emotion regulation systems will offer a better understanding of how these  
353 relationships may predict such outcomes. Third the cross-sectional design precludes conclusions  
354 about causal inferences and mediating effects. However, the independent variable of interest in  
355 the present study was collected retrospectively based on past exposure to abuse, while the  
356 mediators and outcomes were collected based on the present results. Therefore, the foundation  
357 for temporal ordering is present and adds support for the current design (41, 42). Fourth, these  
358 variables may not be the only mediators in the models. It could be that there are other mediators  
359 which may not be in the model or even in the dataset. Nevertheless, we frame our findings in  
360 terms of indirect effects and suggest that the present study findings provide theoretical  
361 contributions and lay the foundation for further longitudinal mediation analysis of the key study  
362 constructs. While we certainly acknowledge these various limitations, this work represents the

363 early stages of a novel approach to understanding an understudied population. Finally, the  
364 sample size was small. Future studies with a larger sample size may be able to test whether  
365 emotion regulation mediates risky sex and confirm the cognitive-emotional model.

366 This is the first known study analyzing the indirect effects of executive function deficit  
367 and poor emotion regulation on lifetime abuse and risk behaviors which provides a framework  
368 for understanding current work but also highlights how much remains to be clarified in future  
369 research. Although there is emergent research on the ability to regulate emotions, cognition, and  
370 behavior in response to internal and external demands in various populations, only one known  
371 prior study measured executive function as the pathway between early life adversity and  
372 performance (43). It will be important to replicate our findings with a greater focus on the  
373 specific processes of executive function and emotion regulation related to self-regulation. It  
374 would also be important to include an interactive approach to the data analysis to clarify how  
375 different components of executive function and emotion regulation support the response to  
376 internal and/or external factors.

## 377 **5.2 Conclusions**

378 This study measured the mediating role of executive function and emotion regulation in  
379 the relationship between lifetime abuse and alcohol use severity and risky sex. Our findings  
380 suggest executive function and emotion regulation as a potential mechanism for alcohol use  
381 severity in women who experienced lifetime abuse (i.e., childhood abuse and intimate partner  
382 violence). Conversely, the indirect pathway for risky sex was only significant through executive  
383 function. We cannot determine the reason for this relationship, but we offered a few theories and  
384 proposed that a longitudinal study may provide further clarification. In sum, we showed that  
385 women exposed to lifetime abuse may have a deficit in their self-regulation mechanism through



386 the cognitive-emotional pathway, thus relying on maladaptive strategies such as alcohol use and  
387 risky sex for regulating their negative emotions.

388

389

## 390 References

- 391 1. Desai S, Arias I, Thompson MP, Basile KC. Childhood victimization and subsequent adult  
392 revictimization assessed in a nationally representative sample of women and men. *Violence Vict.*  
393 2002;17(6):639-53.
- 394 2. Cascardi M. From Violence in the Home to Physical Dating Violence Victimization: The Mediating  
395 Role of Psychological Distress in a Prospective Study of Female Adolescents. *J Youth Adolesc.*  
396 2016;45(4):777-92.
- 397 3. Kuijpers KF, van der Knaap LM, Lodewijks IA. Victims' influence on intimate partner violence  
398 revictimization: a systematic review of prospective evidence. *Trauma Violence Abuse.* 2011;12(4):198-  
399 219.
- 400 4. Aakvaag HF, Thoresen S, Wentzel-Larsen T, Dyb G. Adult Victimization in Female Survivors of  
401 Childhood Violence and Abuse: The Contribution of Multiple Types of Violence. *Violence Against*  
402 *Women.* 2017;23(13):1601-19.
- 403 5. Giraldo-Rodríguez L, Mino-León D, Aragón-Grijalva SO, Agudelo-Botero M. The revictimization of  
404 older Mexican women: understanding the accumulation of multiple victimizations throughout a lifetime.  
405 *BMC Geriatr.* 2022;22(1):41.
- 406 6. Scott-Storey K. Cumulative abuse: do things add up? An evaluation of the conceptualization,  
407 operationalization, and methodological approaches in the study of the phenomenon of cumulative  
408 abuse. *Trauma Violence Abuse.* 2011;12(3):135-50.
- 409 7. Paolucci EO, Genuis ML, Violato C. A meta-analysis of the published research on the effects of  
410 child sexual abuse. *J Psychol.* 2001;135(1):17-36.
- 411 8. Noll JG, Trickett PK, Putnam FW. A prospective investigation of the impact of childhood sexual  
412 abuse on the development of sexuality. *J Consult Clin Psychol.* 2003;71(3):575-86.
- 413 9. Koenig LJ, Clark H. Sexual abuse of girls and HIV infection among women: Are they related?  
414 From child sexual abuse to adult sexual risk: Trauma, revictimization, and intervention. Washington, DC,  
415 US: American Psychological Association; 2004. p. 69-92.
- 416 10. Stoner SAaJNaWHGaDMMaTZaKCDaDMH. Women's condom use assertiveness and sexual risk-  
417 taking: Effects of alcohol intoxication and adult victimization. *Addictive Behaviors.* 2008;33(9):1167-76.
- 418 11. Kendler KS, Bulik CM, Silberg J, Hettema JM, Myers J, Prescott CA. Childhood sexual abuse and  
419 adult psychiatric and substance use disorders in women: an epidemiological and cotwin control analysis.  
420 *Arch Gen Psychiatry.* 2000;57(10):953-9.
- 421 12. Heffernan K, Cloitre M, Tardiff K, Marzuk PM, Portera L, Leon AC. Childhood trauma as a  
422 correlate of lifetime opiate use in psychiatric patients. *Addict Behav.* 2000;25(5):797-803.
- 423 13. Banducci AN, Hoffman EM, Lejuez CW, Koenen KC. The impact of childhood abuse on inpatient  
424 substance users: specific links with risky sex, aggression, and emotion dysregulation. *Child Abuse Negl.*  
425 2014;38(5):928-38.
- 426 14. Zlotnick C, Johnson DM, Stout RL, Zywiak WH, Johnson JE, Schneider RJ. Childhood abuse and  
427 intake severity in alcohol disorder patients. *J Trauma Stress.* 2006;19(6):949-59.
- 428 15. Brems C, Johnson ME, Neal D, Freemon M. Childhood abuse history and substance use among  
429 men and women receiving detoxification services. *Am J Drug Alcohol Abuse.* 2004;30(4):799-821.
- 430 16. Hannan SM, Orcutt HK, Miron LR, Thompson KL. Childhood Sexual Abuse and Later Alcohol-  
431 Related Problems: Investigating the Roles of Revictimization, PTSD, and Drinking Motivations Among  
432 College Women. *J Interpers Violence.* 2017;32(14):2118-38.
- 433 17. Shipman K, Edwards, A., Brown, A., Swisher, L., & Jennings, E. Managing emotion in a  
434 maltreating context: A pilot study examining child neglect. *Child Abuse and Neglect.* 2005;29:1015-29.
- 435 18. Batten SV, Follette, V. M., & Aban, I. Experiential avoidance and high-risk sexual behaviors in  
436 survivors of child sexual abuse. *Journal of Child Sexual Abuse.* 2001;10:101-20.

- 437 19. Cloitre M, Miranda, R., Stovall-McClough, K. C., & Han, H. Beyond PTSD: Emotion regulation and  
438 interpersonal problems as predictors of functional impairment in survivors of childhood abuse. *Behavior*  
439 *Therapy*. 2002;36:119-24.
- 440 20. Tull MT, Weiss NH, Adams CE, Gratz KL. The contribution of emotion regulation difficulties to  
441 risky sexual behavior within a sample of patients in residential substance abuse treatment. *Addict*  
442 *Behav*. 2012;37(10):1084-92.
- 443 21. Tull MT, Bardeen JR, DiLillo D, Messman-Moore T, Gratz KL. A prospective investigation of  
444 emotion dysregulation as a moderator of the relation between posttraumatic stress symptoms and  
445 substance use severity. *J Anxiety Disord*. 2015;29:52-60.
- 446 22. Fruzzetti AE, Iverson KM. *Intervening With Couples and Families to Treat Emotion Dysregulation*  
447 *and Psychopathology*. Emotion regulation in couples and families: Pathways to dysfunction and health.  
448 Washington, DC, US: American Psychological Association; 2006. p. 249-67.
- 449 23. Fruzzetti AE, Worrall JM, editors. *Accurate Expression and Validating Responses: A Transactional*  
450 *Model for Understanding Individual and Relationship Distress* 2010.
- 451 24. Hart H, Rubia K. Neuroimaging of child abuse: a critical review. *Front Hum Neurosci*. 2012;6:52.
- 452 25. Caldwell JG, Krug MK, Carter CS, Minzenberg MJ. Cognitive Control in the Face of Fear: Reduced  
453 Cognitive-Emotional Flexibility in Women with a History of Child Abuse. *Journal of Aggression,*  
454 *Maltreatment & Trauma*. 2014;23(5):454-72.
- 455 26. Miyake A, Friedman NP, Emerson MJ, Witzki AH, Howerter A, Wager TD. The unity and diversity  
456 of executive functions and their contributions to complex "Frontal Lobe" tasks: a latent variable analysis.  
457 *Cognitive psychology*. 2000;41(1):49-100.
- 458 27. Calkins SD, Howse RB. *Individual differences in self-regulation: Implications for childhood*  
459 *adjustment*. The regulation of emotion. Mahwah, NJ, US: Lawrence Erlbaum Associates Publishers;  
460 2004. p. 307-32.
- 461 28. Cloitre M, Koenen KC, Cohen LR, Han H. Skills training in affective and interpersonal regulation  
462 followed by exposure: a phase-based treatment for PTSD related to childhood abuse. *J Consult Clin*  
463 *Psychol*. 2002;70(5):1067-74.
- 464 29. Cicchetti D, Ganiban JM, Barnett D, editors. *Contributions from the study of high risk*  
465 *populations to understanding the development of emotion regulation* 1991.
- 466 30. Gratz KL, Bornovalova MA, Delany-Brumsey A, Nick B, Lejuez CW. A laboratory-based study of  
467 the relationship between childhood abuse and experiential avoidance among inner-city substance users:  
468 The role of emotional nonacceptance. *Behavior Therapy*. 2007;38(3):256-68.
- 469 31. Gratz KL, Roemer L. Multidimensional assessment of emotion regulation and dysregulation:  
470 Development, factor structure, and initial validation of the difficulties in emotion regulation scale.  
471 *Journal of Psychopathology and Behavioral Assessment*. 2004;26(1):41-54.
- 472 32. Dvorak RD, Sargent EM, Kilwein TM, Stevenson BL, Kuvaas NJ, Williams TJ. Alcohol use and  
473 alcohol-related consequences: associations with emotion regulation difficulties. *Am J Drug Alcohol*  
474 *Abuse*. 2014;40(2):125-30.
- 475 33. WHO. WHO multi country study on women's health and life events. *Gender, Equity and Human*  
476 *Rights*. 2005.
- 477 34. Hodes RJ, Insel TR, Landis SC. The NIH toolbox: setting a standard for biomedical research.  
478 *Neurology*. 2013;80(11 Suppl 3):S1.
- 479 35. Messman-Moore TL, Ward RM, Zerubavel N. The role of substance use and emotion  
480 dysregulation in predicting risk for incapacitated sexual revictimization in women: results of a  
481 prospective investigation. *Psychol Addict Behav*. 2013;27(1):125-32.
- 482 36. Walsh K, DiLillo D, Messman-Moore TL. Lifetime sexual victimization and poor risk perception:  
483 does emotion dysregulation account for the links? *J Interpers Violence*. 2012;27(15):3054-71.

- 484 37. Seguin-Lemire A, Hebert M, Cossette L, Langevin R. A longitudinal study of emotion regulation  
485 among sexually abused preschoolers. *Child Abuse Negl.* 2017;63:307-16.
- 486 38. Silveira S, Shah R, Nooner KB, Nagel BJ, Tapert SF, de Bellis MD, et al. Impact of Childhood  
487 Trauma on Executive Function in Adolescence-Mediating Functional Brain Networks and Prediction of  
488 High-Risk Drinking. *Biol Psychiatry Cogn Neurosci Neuroimaging.* 2020;5(5):499-509.
- 489 39. Duffy KA, McLaughlin KA, Green PA. Early life adversity and health-risk behaviors: proposed  
490 psychological and neural mechanisms. *Annals of the New York Academy of Sciences.* 2018;1428(1):151-  
491 69.
- 492 40. George WH, Davis KC, Masters NT, Kajumulo KF, Stappenbeck CA, Norris J, et al. Partner  
493 pressure, victimization history, and alcohol: Women's condom-decision abdication mediated by mood  
494 and anticipated negative partner reaction. *AIDS and Behavior.* 2016;20(Suppl 1):134-46.
- 495 41. Shrout PE. Commentary: Mediation Analysis, Causal Process, and Cross-Sectional Data.  
496 *Multivariate Behav Res.* 2011;46(5):852-60.
- 497 42. Hayes AF. Introduction to mediation, moderation, and conditional process analysis: A  
498 regression-based approach. New York, NY, US: Guilford Press; 2013. xvii, 507-xvii, p.
- 499 43. Cloitre M, Miranda R, Stovall-McClough KC, Han H. Beyond PTSD: Emotion regulation and  
500 interpersonal problems as predictors of functional impairment in survivors of childhood abuse. *Behavior*  
501 *Therapy.* 2005;36:119-24.
- 502

**Figure 1:** Mediation analysis between lifetime abuse, executive function deficit, poor emotion regulation, and alcohol use severity among women of color

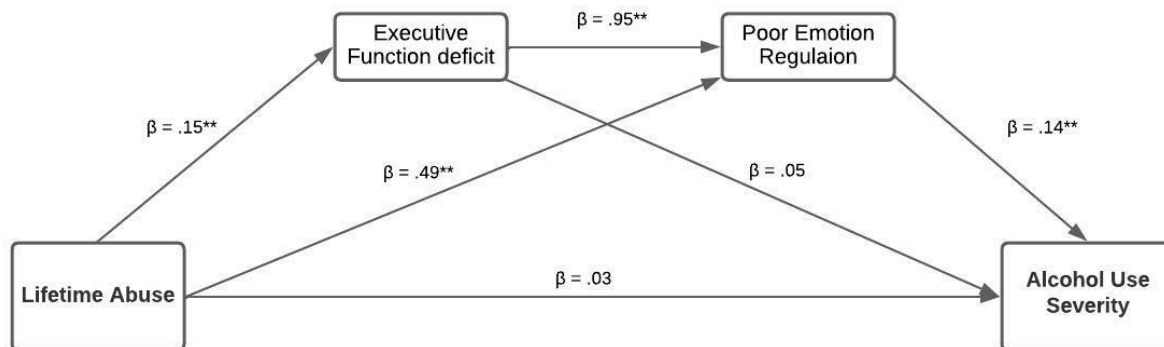

**Figure 2:** Mediation analysis between lifetime abuse, executive function deficit, and risky sex among women of color

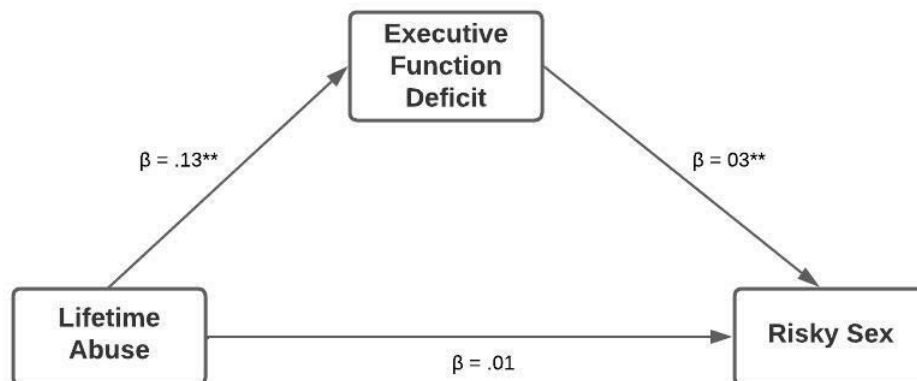

**Table 1** Sociodemographic Characteristics Among Women of Color with Lifetime Abuse

| <b>Demographic Characteristics</b>                                    | <b>n =150</b> |
|-----------------------------------------------------------------------|---------------|
| <b>Age, mean (SD)</b>                                                 | 42 (11)       |
| <b>Race, No (%)</b>                                                   |               |
| White                                                                 | 47 (31)       |
| Black                                                                 | 72 (47)       |
| Other                                                                 | 32 (22)       |
| <b>Hispanic, No (%)</b>                                               | 83 (54)       |
| <b>Marital Status, No (%)</b>                                         |               |
| Single                                                                | 62 (41)       |
| Married                                                               | 37 (24)       |
| Separated/living with a partner                                       | 45 (35)       |
| <b>Education, No (%)</b>                                              |               |
| Some high school or lower                                             | 43 (28)       |
| High school diploma                                                   | 48 (31)       |
| Some College                                                          | 29 (19)       |
| College graduate                                                      | 32 (22)       |
| <b>Income No (%)</b>                                                  |               |
| \$5,000 or less                                                       | 41 (27)       |
| \$5,000 - \$10,000                                                    | 51 (34)       |
| \$10,000 - \$19,999                                                   | 38 (25)       |
| \$30,000 or more                                                      | 21(14)        |
| <b>Risky Behaviors No (%)</b>                                         |               |
| Alcohol use severity score mean (SD)                                  | 10.4 (8.6)    |
| Risky sex (# of sexual partners without a condom in the last 90 days) | 2 (.97)       |
| <b>Regulation, mean (SD)</b>                                          |               |
| Emotion regulation                                                    | 84.2 (24.5)   |
| Executive function                                                    | 72 (12.5)     |

**Table 2.** Study variables correlation analysis

|                                       | <b>1</b>      | <b>2</b>      | <b>3</b>      | <b>4</b>      | <b>5</b>      | <b>6</b> |
|---------------------------------------|---------------|---------------|---------------|---------------|---------------|----------|
| <b>(1) Age</b>                        | .             |               |               |               |               |          |
| <b>(2) Risky Sex</b>                  | <b>-.196*</b> | .             |               |               |               |          |
| <b>(3) Lifetime abuse</b>             | -.068         | .144          | .             |               |               |          |
| <b>(4) Poor emotion regulation</b>    | .069          | <b>.324**</b> | <b>.284**</b> | .             |               |          |
| <b>(5) Executive function deficit</b> | .116          | -.101         | .138          | -.188         | .             |          |
| <b>(6) Alcohol use severity</b>       | <b>.183*</b>  | <b>.250**</b> | .129          | <b>.505**</b> | <b>.325**</b> | .        |



**Table 3:** Direct and Indirect analysis for alcohol use severity and risky sex among women of

| <b>Alcohol Use Severity Model 1</b>                                                          |               |            | <b>Bootstrapping<br/>95% CI</b> |                       |                       |
|----------------------------------------------------------------------------------------------|---------------|------------|---------------------------------|-----------------------|-----------------------|
|                                                                                              | <b>Effect</b> | <b>SE</b>  | <b>Boot<br/>SE</b>              | <b>Lower<br/>2.5%</b> | <b>Upper<br/>2.5%</b> |
| <b>Direct Effect</b>                                                                         |               |            |                                 |                       |                       |
| Lifetime abuse → executive function deficit                                                  | <b>.15</b>    | <b>.05</b> |                                 | <b>.036</b>           | <b>.447</b>           |
| Lifetime abuse → poor emotion regulation                                                     | <b>.49</b>    | <b>.11</b> |                                 | <b>.251</b>           | <b>.722</b>           |
| Executive function deficit → poor emotion regulation                                         | <b>.95</b>    | <b>.24</b> |                                 | <b>1.43</b>           | <b>4.67</b>           |
| Lifetime abuse → alcohol use severity                                                        | .03           | .04        |                                 | -.113                 | .062                  |
| Executive function deficit → alcohol use severity                                            | .05           | .08        |                                 | -.232                 | .123                  |
| Poor emotion regulation → alcohol use severity                                               | <b>.14</b>    | <b>.03</b> |                                 | <b>.064</b>           | <b>.223</b>           |
| <b>Indirect Effect</b>                                                                       |               |            |                                 |                       |                       |
| Lifetime abuse → executive function deficit → poor emotion regulation → alcohol use severity | <b>.097</b>   |            | <b>.031</b>                     | <b>.035</b>           | <b>.158</b>           |
| <b>Risky Sex Model 2</b>                                                                     |               |            |                                 |                       |                       |
| <b>Direct Effect</b>                                                                         |               |            |                                 |                       |                       |
| Lifetime abuse → executive function deficit                                                  | <b>.13</b>    | <b>.05</b> |                                 | <b>.028</b>           | <b>.248</b>           |
| Lifetime abuse → sexual risk behaviors                                                       | .01           | .05        |                                 | -.002                 | .019                  |
| Executive function deficit → sexual risk behaviors                                           | <b>.03</b>    | <b>.02</b> |                                 | <b>-.048</b>          | <b>-.005</b>          |
| <b>Indirect Effect</b>                                                                       |               |            |                                 |                       |                       |
| Lifetime abuse → poor emotion regulation → sexual risk behaviors                             | <b>.078</b>   |            | <b>.051</b>                     | <b>.002</b>           | <b>.198</b>           |

color with a history of lifetime abuse
